# Supplementary material
Source: PubMed Central journal article supplement (PMC6722157)
Supplement: 13280_2018_1127_MOESM1_ESM.pdf [file 13280_2018_1127_MOESM1_ESM.pdf]

**Ambio**

**Electronic Supplementary Material**

**This supplementary material has not been peer reviewed.**

**Title: Assessing ecosystem service trade-offs and synergies: the need for a more mechanistic approach**

## Appendix S1

### Papers selected for the literature review database

1. Ai, J.Y., X. Sun, L. Feng, Y.F. Li, and X.D. Zhu. 2015. Analyzing the spatial patterns and drivers of ecosystem services in rapidly urbanizing Taihu Lake Basin of China. *Frontiers of Earth Science* 9: 531-545.
2. Alarcon, G.G., Y. Ayanu, A.C. Fantini, J. Farley, A. Schmitt, and T. Koellner. 2015. Weakening the Brazilian legislation for forest conservation has severe impacts for ecosystem services in the Atlantic Southern Forest. *Land Use Policy* 47: 1-11.
3. Albizua, A., A. Williams, K. Hedlund, and U. Pascual. 2015. Crop rotations including ley and manure can promote ecosystem services in conventional farming systems. *Applied Soil Ecology* 95: 54-61.
4. Allen, K.E. 2015. Trade-offs in nature tourism: contrasting parcel-level decisions with landscape conservation planning. *Ecology and Society* 20.
5. Anderson-Teixeira, K.J., B.D. Duval, S.P. Long, and E.H. DeLucia. 2012. Biofuels on the landscape: Is "land sharing" preferable to "land sparing"? *Ecological Applications* 22: 2035-2048.
6. Anderson, B.J., P.R. Armsworth, F. Eigenbrod, C.D. Thomas, S. Gillings, A. Heinemeyer, D.B. Roy, and K.J. Gaston. 2009. Spatial covariance between biodiversity and other ecosystem service priorities. *Journal of Applied Ecology* 46: 888-896.
7. Armenteras, D., N. Rodriguez, and J. Retana. 2015. National and regional relationships of carbon storage and tropical biodiversity. *Biological Conservation* 192: 378-386.
8. Bai, Y., Z.Y. Ouyang, H. Zheng, X.M. Li, C.W. Zhuang, and B. Jiang. 2012. Modeling soil conservation, water conservation and their tradeoffs: A case study in Beijing. *Journal of Environmental Sciences-China* 24: 419-426.
9. Bai, Y., H. Zheng, Z.Y. Ouyang, C.W. Zhuang, and B. Jiang. 2013. Modeling hydrological ecosystem services and tradeoffs: a case study in Baiyangdian watershed, China. *Environmental Earth Sciences* 70: 709-718.
10. Balbi, S., A. del Prado, P. Gallejones, C.P. Geewan, G. Pardo, E. Perez-Minana, R. Manrique, C. Hernandez-Santiago, and F. Villa. 2015. Modeling trade-offs among ecosystem services in agricultural production systems. *Environmental Modelling & Software* 72: 314-326.

11. Baral, H., R.J. Keenan, J.C. Fox, N.E. Stork, and S. Kasel. 2013. Spatial assessment of ecosystem goods and services in complex production landscapes: A case study from south-eastern Australia. *Ecological Complexity* 13: 35-45.
12. Baraloto, C., P. Alverga, S.B. Quispe, G. Barnes, N.B. Chura, I.B. da Silva, W. Castro, H. da Souza, I.D. Moll, J.D. Chilo, H.D. Linares, J.G. Quispe, D. Kenji, H. Medeiros, S. Murphy, C.A. Rockwell, A. Shenkin, M. Silveira, J. Southworth, G. Vasquez, and S. Perz. 2014. Trade-offs among forest value components in community forests of southwestern Amazonia. *Ecology and Society* 19.
13. Bartomeus, I., V. Gagic, and R. Bommarco. 2015. Pollinators, pests and soil properties interactively shape oilseed rape yield. *Basic and Applied Ecology* 16: 737-745.
14. Biber, P., J.G. Borges, R. Moshammer, S. Barreiro, B. Botequim, Y. Brodrechtova, V. Brukas, G. Chirici, R. Cordero-Debets, E. Corrigan, L.O. Eriksson, M. Favero, E. Galev, J. Garcia-Gonzalo, G. Hengeveld, M. Kavaliauskas, M. Marchetti, S. Marques, G. Mozgeris, R. Navratil, M. Nieuwenhuis, C. Orazio, I. Paligorov, D. Pettenella, R. Sedmak, R. Smrecek, A. Stanislovaitis, M. Tome, R. Trubins, J. Tucek, M. Vizzarri, I. Wallin, H. Pretzsch, and O. Sallnas. 2015. How Sensitive Are Ecosystem Services in European Forest Landscapes to Silvicultural Treatment? *Forests* 6: 1666-1695.
15. Boreux, V., C.G. Kushalappa, P. Vaast, and J. Ghazoul. 2013. Interactive effects among ecosystem services and management practices on crop production: Pollination in coffee agroforestry systems. *Proceedings of the National Academy of Sciences of the United States of America* 110: 8387-8392.
16. Brandt, P., D.J. Abson, D.A. DellaSala, R. Feller, and H. von Wehrden. 2014. Multifunctionality and biodiversity: Ecosystem services in temperate rainforests of the Pacific Northwest, USA. *Biological Conservation* 169: 362-371.
17. Briner, S., R. Huber, P. Bebi, C. Elkin, D.R. Schmatz, and A. Gret-Regamey, A. 2013. Trade-Offs between Ecosystem Services in a Mountain Region. *Ecology and Society* 18.
18. Brittain, C., N. Williams, C. Kremen, and A.M. Klein. 2013. Synergistic effects of non-Apis bees and honey bees for pollination services. *Proceedings of the Royal Society B-Biological Sciences* 280.
19. Butler, J.R.A., G.Y. Wong, D.J. Metcalfe, M. Honzak, P.I. Pert, N. Rao, M.E. van Grieken, T. Lawson, C. Bruce, F.J. Kroon, and J.E. Brodie. 2013. An analysis of trade-offs between multiple ecosystem services and stakeholders linked to land use and water quality management in the Great Barrier Reef, Australia. *Agriculture Ecosystems & Environment* 180: 176-191.

- 20.** Cademus, R., F.J. Escobedo, D. McLaughlin, and A. Abd-Elrahman. 2014. Analyzing Trade-Offs, Synergies, and Drivers among Timber Production, Carbon Sequestration, and Water Yield in *Pinus elliotii* Forests in Southeastern USA. *Forests* 5: 1409-1431.
- 21.** Carswell, F.E., N.W.H. Mason, J.M. Overton, R. Price, L.E. Burrows, and R.B. Allen. 2015. Restricting new forests to conservation lands severely constrains carbon and biodiversity gains in New Zealand. *Biological Conservation* 181: 206-218.
- 22.** Castro, A.J., B. Martin-Lopez, E. Lopez, T. Plieninger, D. Alcaraz-Segura, C.C. Vaughn, and J. Cabello. 2015. Do protected areas networks ensure the supply of ecosystem services? Spatial patterns of two nature reserve systems in semi-arid Spain. *Applied Geography* 60: 1-9.
- 23.** Chung, M.G., H. Kang, and S.U. Choi. 2015. Assessment of Coastal Ecosystem Services for Conservation Strategies in South Korea. *PLOS ONE* 10.
- 24.** Classen, A., M.K. Peters, S.W. Ferger, M. Helbig-Bonitz, J.M. Schmack, G. Maassen, M. Schleuning, E.K.V. Kalko, K. Bohning-Gaese, and I. Steffan-Dewenter. 2014. Complementary ecosystem services provided by pest predators and pollinators increase quantity and quality of coffee yields. *Proceedings of the Royal Society B-Biological Sciences* 281.
- 25.** Clough, Y., J. Barkmann, J. Juhbandt, M. Kessler, T.C. Wanger, A. Anshary, D. Buchori, D. Cicuzza, K. Darras, D.D. Putra, S. Erasmi, R. Pitopang, C. Schmidt, C.H. Schulze, D. Seidel, I. Steffan-Dewenter, K. Stenchly, S. Vidal, M. Weist, A.C. Wielgoss, and T. Tscharntke. 2011. Combining high biodiversity with high yields in tropical agroforests. *Proceedings of the National Academy of Sciences of the United States of America* 108: 8311-8316.
- 26.** Cohen-Shacham, E., T. Dayan, E. Feitelson, and R.S. de Groot. 2011. Ecosystem service trade-offs in wetland management: drainage and rehabilitation of the Hula, Israel. *Hydrological Sciences Journal-Journal Des Sciences Hydrologiques* 56: 1582-1601.
- 27.** Cordingley, J.E., A.C. Newton, R.J. Rose, R.T. Clarke, and J.M. Bullock, J.M. 2015. Habitat Fragmentation Intensifies Trade-Offs between Biodiversity and Ecosystem Services in a Heathland Ecosystem in Southern England. *PLOS ONE* 10.
- 28.** Crouzat, E., M. Mouchet, F. Turkelboom, C. Byczek, J. Meersmans, F. Berger, P.J. Verkerk, and S. Lavorel. 2015. Assessing bundles of ecosystem services from regional to landscape scale: insights from the French Alps. *Journal of Applied Ecology* 52: 1145-1155.
- 29.** Deguines, N., C. Jono, M. Baude, M. Henry, R. Julliard, and C. Fontaine. 2014. Large-scale trade-off between agricultural intensification and crop pollination services. *Frontiers in Ecology and the Environment* 12: 212-217.

- 30.** Deines, A.M., C.A. Bee, C. Katongo, R. Jensen, and D.M. Lodge. 2013. The potential trade-off between artisanal fisheries production and hydroelectricity generation on the Kafue River, Zambia. *Freshwater Biology* 58: 640-654.
- 31.** Dickie, I.A., G.W. Yeates, M.G. St John, B.A. Stevenson, J.T. Scott, M.C. Rillig, D.A. Peltzer, K.H. Orwin, M.U.F. Kirschbaum, J.E. Hunt, L.E. Burrows, M.M. Barbour, and J. Aislabie. 2011. Ecosystem service and biodiversity trade-offs in two woody successions. *Journal of Applied Ecology* 48: 926-934.
- 32.** Dobbs, C., D. Kendal, and C.R. Nitschke. 2014. Multiple ecosystem services and disservices of the urban forest establishing their connections with landscape structure and sociodemographics. *Ecological Indicators* 43: 44-55.
- 33.** Dobbs, C., C.R. Nitschke, and D. Kendal. 2014. Global Drivers and Tradeoffs of Three Urban Vegetation Ecosystem Services. *PLOS ONE* 9.
- 34.** Doherty, J.M., J.F. Miller, S.G. Prellwitz, A.M. Thompson, S.P. Loheide, and J.B. Zedler. 2014. Hydrologic Regimes Revealed Bundles and Tradeoffs Among Six Wetland Services. *Ecosystems* 17: 1026-1039.
- 35.** Duncker, P.S., K. Raulund-Rasmussen, P. Gundersen, K. Katzensteiner, J. De Jong, H.P. Ravn, M. Smith, O. Eckmullner, and H. Spiecker. 2012. How Forest Management affects Ecosystem Services, including Timber Production and Economic Return: Synergies and Trade-Offs. *Ecology and Society* 17.
- 36.** Dymond, J.R., A.G.E. Ausseil, J.C. Ekanayake, and M.U.F. Kirschbaum. 2012. Tradeoffs between soil, water, and carbon - A national scale analysis from New Zealand. *Journal of environmental management* 95: 124-131.
- 37.** Eigenbrod, F., B.J. Anderson, P.R. Armsworth, A. Heinemeyer, S.F. Jackson, M. Parnell, C.D. Thomas, and K.J. Gaston. 2009. Ecosystem service benefits of contrasting conservation strategies in a human-dominated region. *Proceedings of the Royal Society B-Biological Sciences* 276: 2903-2911.
- 38.** Ewing, P.M., and B.C. Runck. 2015. Optimizing nitrogen rates in the midwestern United States for maximum ecosystem value. *Ecology and Society* 20.
- 39.** Felipe-Lucia, M.R., and F.A. Comin. 2015. Ecosystem services-biodiversity relationships depend on land use type in floodplain agroecosystems. *Land Use Policy* 46: 201-210.
- 40.** Felipe-Lucia, M.R., F.A. Comin, and E.M. Bennett. 2014. Interactions Among Ecosystem Services Across Land Uses in a Floodplain Agroecosystem. *Ecology and Society* 19.

41. Fezzi, C., A.R. Harwood, A.A. Lovett, and I.J. Bateman. 2015. The environmental impact of climate change adaptation on land use and water quality. *Nature Climate Change* 5: 255-260.
42. Forouzangohar, M., N.D. Crossman, R.J. MacEwan, D.D. Wallace, and L.T. Bennett. 2014. Ecosystem Services in Agricultural Landscapes: A Spatially Explicit Approach to Support Sustainable Soil Management. *Scientific World Journal*.
43. Frank, S., C. Furst, and F. Pietzsch. 2015. Cross-Sectoral Resource Management: How Forest Management Alternatives Affect the Provision of Biomass and Other Ecosystem Services. *Forests* 6: 533-560.
44. Gamfeldt, L., T. Snäll, R. Bagchi, M. Jonsson, L. Gustafsson, P. Kjellander, M.C. Ruiz-Jaen, M. Froberg, J. Stendahl, C.D. Philipson, G. Mikusinski, E. Andersson, B. Westerlund, H. Andren, F. Moberg, J. Moen, and J. Bengtsson. 2013. Higher levels of multiple ecosystem services are found in forests with more tree species. *Nature Communications* 4.
45. Garca-Llorente, M., I. Iniesta-Arandia, B.A. Willaarts, P.A. Harrison, P. Berry, M.D. Bayo, A.J. Castro, C. Montes, B. Martin-Lopez. 2015. Biophysical and sociocultural factors underlying spatial trade-offs of ecosystem services in semiarid watersheds. *Ecology and Society* 20.
46. Garcia-Fayos, P., and E. Bochet. 2009. Indication of antagonistic interaction between climate change and erosion on plant species richness and soil properties in semiarid Mediterranean ecosystems. *Global change biology* 15: 306-318.
47. Geneletti, D. 2013. Assessing the impact of alternative land-use zoning policies on future ecosystem services. *Environmental Impact Assessment Review* 40: 25-35.
48. Gimona, A., and D. van der Horst. 2007. Mapping hotspots of multiple landscape functions: a case study on farmland afforestation in Scotland. *Landscape Ecology* 22: 1255-1264.
49. Gonzalez-Esquivel, C.E., M.E. Gavito, M. Astier, M. Cadena-Salgado, E. del Val, L. Villamil-Echeverri, Y. Merlin-Urbe, and P. Balvanera. 2015. Ecosystem service trade-offs, perceived drivers, and sustainability in contrasting agroecosystems in central Mexico. *Ecology and Society* 20.
50. Grimaldi, M., J. Oszwald, S. Doledec, M.D Hurtado, I.D. Miranda, X.A. de Sartre, W.S. de Assis, E. Castaneda, T. Desjardins, F. Dubs, E. Guevara, V. Gond, T.T.S. Lima, R. Marichal, F. Michelotti, D. Mitja, N.C. Noronha, M.N.D. Oliveira, B. Ramirez, G. Rodriguez, M. Sarrazin, M.L. da Silva, L.G.S. Costa, S.L. de Souza, I. Veiga, E. Velasquez, and P. Lavelle. 2014. Ecosystem services of regulation and support in Amazonian pioneer fronts: searching for landscape drivers. *Landscape Ecology* 29: 311-328.

- 51.** Grossman, J.J. 2015. Ecosystem service trade-offs and land use among smallholder farmers in eastern Paraguay. *Ecology and Society* 20.
- 52.** Haase, D., N. Schwarz, M. Strohbach, F. Kroll, and R. Seppelt. 2012. Synergies, Trade-offs, and Losses of Ecosystem Services in Urban Regions: an Integrated Multiscale Framework Applied to the Leipzig-Halle Region, Germany. *Ecology and Society* 17.
- 53.** Haines-Young, R., M. Potschin, and F. Kienast. 2012. Indicators of ecosystem service potential at European scales: Mapping marginal changes and trade-offs. *Ecological Indicators* 21: 39-53.
- 54.** Hall, J.M., T. Van Holt, A.E. Daniels, V. Balthazar, and E.F. Lambin. 2012. Trade-offs between tree cover, carbon storage and floristic biodiversity in reforesting landscapes. *Landscape Ecology* 27: 1135-1147.
- 55.** Harmackova, Z.V., D. Vackar. 2015. Modelling regulating ecosystem services trade-offs across landscape scenarios in Trebonsko Wetlands Biosphere Reserve, Czech Republic. *Ecological Modelling* 295: 207-215.
- 56.** Holt, A.R., M. Mears, L. Maltby, and P. Warren. 2015. Understanding spatial patterns in the production of multiple urban ecosystem services. *Ecosystem Services* 16: 33-46.
- 57.** Jessop, J., G. Spyreas, G.E. Pociask, T.J. Benson, M.P. Ward, A.D. Kent, and J.W. Matthews. 2015. Tradeoffs among ecosystem services in restored wetlands. *Biological Conservation* 191: 341-348.
- 58.** Jia, X.Q., B.J. Fu, X.M. Feng, G.H. Hou, Y. Liu, and X.F. Wang. 2014. The tradeoff and synergy between ecosystem services in the Grain-for-Green areas in Northern Shaanxi, China. *Ecological Indicators* 43: 103-113.
- 59.** Jiang, M.K., J.M. Bullock, and D.A.P. Hooftman. 2013. Mapping ecosystem service and biodiversity changes over 70 years in a rural English county. *Journal of Applied Ecology* 50: 841-850.
- 60.** Jopke, C., J. Kreyling, J. Maes, and T. Koellner. 2015. Interactions among ecosystem services across Europe: Bagplots and cumulative correlation coefficients reveal synergies, trade-offs, and regional patterns. *Ecological Indicators* 53: 295-296.
- 61.** Kirchner, M., J. Schmidt, G. Kindermann, V. Kulmer, H. Mitter, F. Pretenthaler, J. Rudisser, T. Schauppenlehner, M. Schonhart, F. Strauss, U. Tappeiner, E. Tasser, and E. Schmid. 2015. Ecosystem services and economic development in Austrian agricultural landscapes - The impact of policy and climate change scenarios on trade-offs and synergies. *Ecological economics* 109: 161-174.

- 62.** Klein, T., A. Holzkamper, P. Calanca, and J. Fuhrer. 2014. Adaptation options under climate change for multifunctional agriculture: a simulation study for western Switzerland. *Regional Environmental Change* 14: 167-184.
- 63.** Kozak, J.P., M.G. Bennett, A. Hayden-Lesmeister, K.A. Fritz, and A. Nickolotsky. 2015. Using Flow-Ecology Relationships to Evaluate Ecosystem Service Trade-Offs and Complementarities in the Nation's Largest River Swamp. *Environmental Management* 55: 1327-1342.
- 64.** Kragt, M.E., and M.J. Robertson. 2014. Quantifying ecosystem services trade-offs from agricultural practices. *Ecological Economics* 102: 147-157.
- 65.** Lafond, V., T. Cordonnier, and B. Courbaud. 2015. Reconciling Biodiversity Conservation and Timber Production in Mixed Uneven-Aged Mountain Forests: Identification of Ecological Intensification Pathways. *Environmental Management* 56: 1118-1133.
- 66.** Laterra, P., M.E. Orue, and G.C. Booman. 2012. Spatial complexity and ecosystem services in rural landscapes. *Agriculture Ecosystems & Environment* 154: 56-67.
- 67.** Lauf, S., D. Haase, and B. Kleinschmit. 2014. Linkages between ecosystem services provisioning, urban growth and shrinkage - A modeling approach assessing ecosystem service trade-offs. *Ecological Indicators* 42: 73-94.
- 68.** Lautenbach, S., M. Volk, M. Strauch, G. Whittaker, and R. Seppelt. 2013. Optimization-based trade-off analysis of biodiesel crop production for managing an agricultural catchment. *Environmental Modelling & Software* 48, 98-112.
- 69.** Lavorel, S., and K. Grigulis. 2012. How fundamental plant functional trait relationships scale-up to trade-offs and synergies in ecosystem services. *Journal of Ecology* 100: 128-140.
- 70.** Law, E.A., B.A. Bryan, E. Meijaard, T. Mallawaarachchi, M. Struebig, and K.A. Wilson. 2015. Ecosystem services from a degraded peatland of Central Kalimantan: implications for policy, planning, and management. *Ecological Applications* 25: 70-87.
- 71.** Lawler, J.J., D.J. Lewis, E. Nelson, A.J. Plantinga, S. Polasky, J.C. Withey, D.P. Helmers, S. Martinuzzi, D. Pennington, and V.C. Radeloff. 2014. Projected land-use change impacts on ecosystem services in the United States. *Proceedings of the National Academy of Sciences of the United States of America* 111: 7492-7497.
- 72.** Leh, M.D.K., M.D. Matlock, E.C. Cummings, and L.L. Nalley. 2013. Quantifying and mapping multiple ecosystem services change in West Africa. *Agriculture Ecosystems & Environment* 165: 6-18.



- 73.** Locatelli, B., P. Imbach, and S. Wunder. 2014. Synergies and trade-offs between ecosystem services in Costa Rica. *Environmental Conservation* 41: 27-36.
- 74.** Lu, N., B.J. Fu, T.T. Jin, and R.Y. Chang. 2014. Trade-off analyses of multiple ecosystem services by plantations along a precipitation gradient across Loess Plateau landscapes. *Landscape Ecology* 29: 1697-1708.
- 75.** Lundin, O., H.G. Smith, M. Rundlof, and R. Bommarco. 2013. When ecosystem services interact: crop pollination benefits depend on the level of pest control. *Proceedings of the Royal Society B-Biological Sciences* 280.
- 76.** Maes, J., M.L. Paracchini, G. Zulian, M.B. Dunbar, and R. Alkemade. 2012. Synergies and trade-offs between ecosystem service supply, biodiversity, and habitat conservation status in Europe. *Biological Conservation* 155: 1-12.
- 77.** Maskell, L.C., A. Crowe, M.J. Dunbar, B. Emmett, P. Henrys, A.M. Keith, L.R. Norton, P. Scholefield, D.B. Clark, I.C. Simpson, and S.M. Smart. 2013. Exploring the ecological constraints to multiple ecosystem service delivery and biodiversity. *Journal of Applied Ecology* 50: 561-571.
- 78.** Meehan, T.D., C. Gratton, E. Diehl, N.D. Hunt, D.F. Mooney, S.J. Ventura, B.L. Barham, and R.D. Jackson. 2013. Ecosystem-Service Tradeoffs Associated with Switching from Annual to Perennial Energy Crops in Riparian Zones of the US Midwest. *PLOS ONE* 8.
- 79.** Menzel, S., C.V. Kappel, B.R. Broitman, F. Micheli, and A.A. Rosenberg. 2013. Linking human activity and ecosystem condition to inform marine ecosystem based management. *Aquatic Conservation-Marine and Freshwater Ecosystems* 23: 506-514.
- 80.** Meyer, M.A., T. Chand, and J.A. Priess. 2015. Comparing Bioenergy Production Sites in the Southeastern US Regarding Ecosystem Service Supply and Demand. *PLOS ONE* 10.
- 81.** Miteva, D.A., B.C. Murray, and S.K. Pattanayak. 2015. Do protected areas reduce blue carbon emissions? A quasi-experimental evaluation of mangroves in Indonesia. *Ecological Economics* 119: 127-135.
- 82.** Naidoo, R., A. Balmford, R. Costanza, B. Fisher, R.E. Green, B. Lehner, T.R. Malcolm, and T.H. Ricketts. 2008. Global mapping of ecosystem services and conservation priorities. *Proceedings of the National Academy of Sciences of the United States of America* 105: 9495-9500.
- 83.** Nelson, E., H. Sander, P. Hawthorne, M. Conte, D. Ennaanay, S. Wolny, S. Manson, and S. Polasky. 2010. Projecting Global Land-Use Change and Its Effect on Ecosystem Service Provision and Biodiversity with Simple Models. *PLOS ONE* 5.

- 84.** Nunery, J.S., and W.S. Keeton. 2010. Forest carbon storage in the northeastern United States: Net effects of harvesting frequency, post-harvest retention, and wood products. *Forest Ecology and Management* 259: 1363-1375.
- 85.** Onaindia, M., B.F. de Manuel, I. Madariaga, and G. Rodriguez-Loinaz. 2013. Co-benefits and trade-offs between biodiversity, carbon storage and water flow regulation. *Forest Ecology and Management* 289: 1-9.
- 86.** Onatibia, G.R., M.R. Aguiar, and M. Semmartin. 2015. Are there any trade-offs between forage provision and the ecosystem service of C and N storage in arid rangelands? *Ecological Engineering* 77: 26-32.
- 87.** Pan, Y., J.X. Wu, and Z.R. Xu. 2014. Analysis of the tradeoffs between provisioning and regulating services from the perspective of varied share of net primary production in an alpine grassland ecosystem. *Ecological Complexity* 17: 79-86.
- 88.** Qin, K.Y., J. Li, and X.N. Yang. 2015. Trade-Off and Synergy among Ecosystem Services in the Guanzhong-Tianshui Economic Region of China. *International Journal of Environmental Research and Public Health* 12: 14094-14113.
- 89.** Qiu, J.X., and M.G. Turner. 2013. Spatial interactions among ecosystem services in an urbanizing agricultural watershed. *Proceedings of the National Academy of Sciences of the United States of America* 110: 12149-12154.
- 90.** Queiroz, C., M. Meacham, K. Richter, A.V. Norstrom, E. Andersson, J. Norberg, and G. Peterson. 2015. Mapping bundles of ecosystem services reveals distinct types of multifunctionality within a Swedish landscape. *Ambio* 44: S89-S101.
- 91.** Raudsepp-Hearne, C., G.D. Peterson, and E.M. Bennett. 2010. Ecosystem service bundles for analyzing tradeoffs in diverse landscapes. *Proceedings of the National Academy of Sciences of the United States of America* 107: 5242-5247.
- 92.** Renard, D., J.M. Rhemtulla, and E.M. Bennett. 2015. Historical dynamics in ecosystem service bundles. *Proceedings of the National Academy of Sciences of the United States of America* 112: 13411-13416.
- 93.** Richards, M.B., and V.E. Mendez. 2014. Interactions between Carbon Sequestration and Shade Tree Diversity in a Smallholder Coffee Cooperative in El Salvador. *Conservation Biology* 28: 489-497.
- 94.** Rodriguez-Loinaz, G., J.G. Alday, and M. Onaindia. 2015. Multiple ecosystem services landscape index: A tool for multifunctional landscapes conservation. *Journal of environmental management* 147: 152-163.

- 95.** Rodriguez, N., D. Armenteras, and J. Retana. 2015. National ecosystems services priorities for planning carbon and water resource management in Colombia. *Land Use Policy* 42: 609-618.
- 96.** Rouquette, J.R., H. Posthumus, J. Morris, T.M. Hess, Q.L. Dawson, D.J.G. Gowing. 2011. Synergies and trade-offs in the management of lowland rural floodplains: an ecosystem services approach. *Hydrological Sciences Journal-Journal Des Sciences Hydrologiques* 56: 1566-1581.
- 97.** Santos-Martin, F., B. Martin-Lopez, M. Garcia-Llorente, M. Aguado, J. Benayas, and C. Montes. 2013. Unraveling the Relationships between Ecosystems and Human Wellbeing in Spain. *PLOS ONE* 8.
- 98.** Shih, S.S., H.L. Hsieh, P.H. Chen, C.P. Chen, and H.J. Lin. 2015. Tradeoffs between reducing flood risks and storing carbon stocks in mangroves. *Ocean & Coastal Management* 105: 116-126.
- 99.** Strassburg, B.B.N., A. Kelly, A. Balmford, R.G. Davies, H.K. Gibbs, A. Lovett, L. Miles, C.D.L. Orme, J. Price, R.K. Turner, A.S.L. Rodrigues. 2010. Global congruence of carbon storage and biodiversity in terrestrial ecosystems. *Conservation Letters* 3: 98-105.
- 100.** Sturck, J., C.J.E. Schulp, and P.H. Verburg. 2015. Spatio-temporal dynamics of regulating ecosystem services in Europe - The role of past and future land use change. *Applied Geography* 63: 121-135.
- 101.** Su, C.H., B.J. Fu, C.S. He, and Y.H. Lu. 2012. Variation of ecosystem services and human activities: A case study in the Yanhe Watershed of China. *Acta Oecologica-International Journal of Ecology* 44: 46-57.
- 102.** Swallow, B.M., J.K. Sang, M. Nyabenge, D.K. Bundotich, A.K. Duraiappah, and T.B. Yatich. 2009. Tradeoffs, synergies and traps among ecosystem services in the Lake Victoria basin of East Africa. *Environmental science & policy* 12: 504-519.
- 103.** Syswerda, S.P., and G.P. Robertson. 2014. Ecosystem services along a management gradient in Michigan (USA) cropping systems. *Agriculture Ecosystems & Environment* 189: 28-35.
- 104.** Trivino, M., A. Juutinen, A. Mazziotta, K. Miettinen, D. Podkopaev, P. Reunanen, and M. Monkkonen. 2015. Managing a boreal forest landscape for providing timber, storing and sequestering carbon. *Ecosystem Services* 14: 179-189.

- 105.** Turner, K.G., M.V. Odgaard, P.K. Bocher, T. Dalgaard, and J.C. Svenning. 2014. Bundling ecosystem services in Denmark: Trade-offs and synergies in a cultural landscape. *Landscape and Urban Planning* 125: 89-104.
- 106.** Vacchiano, G., M. Maggioni, G. Perseghin, and R. Motta. 2015. Effect of avalanche frequency on forest ecosystem services in a spruce-fir mountain forest. *Cold Regions Science and Technology* 115: 9-21.
- 107.** Wang, Y.B., P.T. Wu, B.A. Engel, and S.K. Sun. 2015. Comparison of volumetric and stress-weighted water footprint of grain products in China. *Ecological Indicators* 48: 324-333.
- 108.** Williams, A., and K. Hedlund. 2014. Indicators and trade-offs of ecosystem services in agricultural soils along a landscape heterogeneity gradient. *Applied Soil Ecology* 77: 1-8.
- 109.** Wu, C.F., Y.P. Lin, L.C. Chiang, and T. Huang. 2014. Assessing highway's impacts on landscape patterns and ecosystem services: A case study in Puli Township, Taiwan. *Landscape and Urban Planning* 128: 60-71.
- 110.** Xue, H., S.Y. Li, and J. Chang. 2015. Combining ecosystem service relationships and DPSIR framework to manage multiple ecosystem services. *Environmental Monitoring and Assessment* 187.
- 111.** Yang, G.F., Y. Ge, H. Xue, W. Yang, Y. Shi, C.H. Peng, Y.Y. Du, X. Fan, Y. Ren, and J. Chang. 2015. Using ecosystem service bundles to detect trade-offs and synergies across urban-rural complexes. *Landscape and Urban Planning* 136: 110-121.
- 112.** Zhang, L.W., B.J. Fu, Y.H. Lu, and Y. Zeng. 2015. Balancing multiple ecosystem services in conservation priority setting. *Landscape Ecology* 30: 535-546.
- 113.** Zheng, Z.M., B.J. Fu, H.T. Hu, and G. Sun, G. 2014. A method to identify the variable ecosystem services relationship across time: a case study on Yanhe Basin, China. *Landscape Ecology* 29: 1689-1696.
- 114.** Alamgir, M., S.M. Turton, C.J. Macgregor, and P.L. Pert. 2016. Ecosystem services capacity across heterogeneous forest types: understanding the interactions and suggesting pathways for sustaining multiple ecosystem services. *Science of the Total Environment* 566: 584-595.
- 115.** Ament, J.M., C.A. Moore, M. Herbst, and G.S. Cumming. 2017. Cultural Ecosystem Services in Protected Areas: Understanding Bundles, Trade-Offs, and Synergies. *Conservation Letters* 10: 440-450.

- 116.** Barnett, A., J. Fargione, and M.P. Smith. 2016. Mapping Trade-Offs in Ecosystem Services from Reforestation in the Mississippi Alluvial Valley. *BioScience* 66: 223-237.
- 117.** Bisseleua, D.H.B., D. Begoude, H. Tonnang, and S. Vidal, S. 2017. Ant-mediated ecosystem services and disservices on marketable yield in cocoa agroforestry systems. *Agriculture Ecosystems & Environment* 247: 409-417.
- 118.** Blaser, W.J., J. Opong, E. Yeboah, and J. Six. 2017. Shade trees have limited benefits for soil fertility in cocoa agroforests. *Agriculture Ecosystems & Environment* 243: 83-91.
- 119.** Bottalico, F., L. Pesola, M. Vizzarri, L. Antonello, A. Barbati, G. Chirici, P. Corona, S. Cullotta, V. Garfi, V. Giannico, R. Laforteza, F. Lombardi, M. Marchetti, S. Nocentini, F. Riccioli, D. Travaglini, and L. Sallustio. 2016. Modeling the influence of alternative forest management scenarios on wood production and carbon storage: A case study in the Mediterranean region. *Environmental Research* 144: 72-87.
- 120.** Carpentier, S., E. Filotas, I.T. Handa, and C. Messier. 2017. Trade-offs between timber production, carbon stocking and habitat quality when managing woodlots for multiple ecosystem services. *Environmental Conservation* 44: 14-23.
- 121.** Cerda, R., C. Allinne, C. Gary, P. Tixier, C.A. Harvey, L. Krolczyk, C. Mathiot, E. Clement, J.N. Aubertot, and J. Avelino. 2017. Effects of shade, altitude and management on multiple ecosystem services in coffee agroecosystems. *European Journal of Agronomy* 82: 308-319.
- 122.** Dai, E.F., X.L. Wang, J.J. Zhu, and W.M. Xi. 2017. Quantifying ecosystem service trade-offs for plantation forest management to benefit provisioning and regulating services. *Ecology and Evolution* 7: 7807-7821.
- 123.** Eastburn, D.J., A.T. O'Geen, K.W. Tate, and L.M. Roche. 2017. Multiple ecosystem services in a working landscape. *PLOS ONE* 12.
- 124.** Fan, M., H. Shibata, and Q. Wang. 2016. Optimal conservation planning of multiple hydrological ecosystem services under land use and climate changes in Teshio river watershed, northernmost of Japan. *Ecological Indicators* 62: 1-13.
- 125.** Feng, Q., W.W. Zhao, B.J. Fu, J.Y. Ding, and S. Wang. 2017. Ecosystemservice trade-offs and their influencing factors: A case study in the Loess Plateau of China. *Science of the Total Environment* 607: 1250-1263.
- 126.** Fernandez-Campo, M., B. Rodriguez-Morales, W.E. Dramstad, W. Fjellstad, and E.R. Diaz-Varela. 2017. Ecosystem services mapping for detection of bundles, synergies and trade-offs: Examples from two Norwegian municipalities. *Ecosystem Services* 28: 283-297.

- 127.** Forbes, S.J., and T.D. Northfield. 2017. Increased pollinator habitat enhances cacao fruit set and predator conservation. *Ecological Applications* 27: 887-899.
- 128.** Gissi, E., M. Gaglio, and M. Reho, M. 2016. Sustainable energy potential from biomass through ecosystem services trade-off analysis: The case of the Province of Rovigo (Northern Italy). *Ecosystem Services* 18: 1-19.
- 129.** Han, H.Q., and Y.X. Dong. 2017. Assessing and mapping of multiple ecosystem services in Guizhou Province, China. *Tropical Ecology* 58: 331-346.
- 130.** Hao, R.F., D.Y. Yu, and J.G. Wu. 2017. Relationship between paired ecosystem services in the grassland and agro-pastoral transitional zone of China using the constraint line method. *Agriculture Ecosystems & Environment* 240: 171-181.
- 131.** Hou, Y., Y.H. Lu, W.P. Chen, and B.J. Fu. 2017. Temporal variation and spatial scale dependency of ecosystem service interactions: a case study on the central Loess Plateau of China. *Landscape Ecology* 32: 1201-1217.
- 132.** Jiang, C., D.Q. Li, D.W. Wang, and L.B. Zhang. 2016. Quantification and assessment of changes in ecosystem service in the Three-River Headwaters Region, China as a result of climate variability and land cover change. *Ecological Indicators* 66: 199-211.
- 133.** Lafond, V., T. Cordonnier, Z. Mao, and B. Courbaud. 2017. Trade-offs and synergies between ecosystem services in uneven-aged mountain forests: evidences using Pareto fronts. *European Journal of Forest Research* 136: 997-1012.
- 134.** Li, X.X., Y. Kamarianakis, Y. Ouyang, B.L. Turner, and A. Brazel. 2017. On the association between land system architecture and land surface temperatures: Evidence from a Desert Metropolis-Phoenix, Arizona, USA. *Landscape and Urban Planning* 163: 107-120.
- 135.** Li, Y.J., L.W. Zhang, J.X. Qiu, J.P. Yan, L.W. Wan, P.T. Wang, N.K. Hu, W. Cheng, and B.J. Fu. 2017. Spatially explicit quantification of the interactions among ecosystem services. *Landscape Ecology* 32: 1181-1199.
- 136.** Meylan, L., C. Gary, C. Allinne, J. Ortiz, L. Jackson, and B. Rapidel. 2017. Evaluating the effect of shade trees on provision of ecosystem services in intensively managed coffee plantations. *Agriculture Ecosystems & Environment* 245: 32-42.
- 137.** Mora, F., P. Balvanera, E. Garcia-Frapolli, A. Castillo, J.M. Trilleras, D. Cohen-Salgado, and O. Salmeron. 2016. Trade-offs between ecosystem services and alternative pathways toward sustainability in a tropical dry forest region. *Ecology and Society* 21.

- 138.** Niu, K.C., J.S. He, S.T. Zhang, and M.J. Lechowicz. 2016. Tradeoffs between forage quality and soil fertility: Lessons from Himalayan rangelands. *Agriculture Ecosystems & Environment* 234: 31-39.
- 139.** Pang, X., E.M. Nordstrom, H. Bottcher, R. Trubins, and U. Mortberg. 2017. Trade-offs and synergies among ecosystem services under different forest management scenarios - The LEcA tool. *Ecosystem Services* 28: 67-79.
- 140.** Pickard, B.R., D. Van Berkel, A. Petrasova, R.K. Meentemeyer. 2017. Forecasts of urbanization scenarios reveal trade-offs between landscape change and ecosystem services. *Landscape Ecology* 32: 617-634.
- 141.** Rana, E., R. Thwaites, and G. Luck. 2017. Trade-offs and synergies between carbon, forest diversity and forest products in Nepal community forests. *Environmental Conservation* 44: 5-13.
- 142.** Roces-Diaz, J.V., B. Burkhard, M. Kruse, F. Muller, E.R. Diaz-Varela, and P. Alvarez-Alvarez. 2017. Use of ecosystem information derived from forest thematic maps for spatial analysis of ecosystem services in northwestern Spain. *Landscape and Ecological Engineering* 13: 45-57.
- 143.** Schulze, J., K. Frank, J.A. Priess, and M.A. Meyer. 2016. Assessing Regional-Scale Impacts of Short Rotation Coppices on Ecosystem Services by Modeling Land-Use Decisions. *PLOS ONE* 11.
- 144.** Sil, A., A.P. Rodrigues, C. Carvalho-Santos, J.P. Nunes, J. Honrado, J. Alonso, C. Marta-Pedroso, and J.C. Azevedo. 2016. Trade-offs and Synergies Between Provisioning and Regulating Ecosystem Services in a Mountain Area in Portugal Affected by Landscape Change. *Mountain Research and Development* 36: 452-464.
- 145.** Sun, X., and F. Li. 2017. Spatiotemporal assessment and trade-offs of multiple ecosystem services based on land use changes in Zengcheng, China. *Science of the Total Environment* 609: 1569-1581.
- 146.** Sutter, L., and M. Albrecht. 2016. Synergistic interactions of ecosystem services: florivorous pest control boosts crop yield increase through insect pollination. *Proceedings of the Royal Society B-Biological Sciences* 283.
- 147.** Tamburini, G., S. De Simone, M. Sigura, F. Boscutti, and L. Marini. 2016. Soil management shapes ecosystem service provision and trade-offs in agricultural landscapes. *Proceedings of the Royal Society B-Biological Sciences* 283.

- 148.** Tian, Y.C., S.J. Wang, X.Y. Bai, G.J. Luo, and Y. Xu. 2016. Trade-offs among ecosystem services in a typical Karst watershed, SW China. *Science of the Total Environment* 566: 1297-1308.
- 149.** Trodahl, M.I., B.M. Jackson, J.R. Deslippe, and A.K. Metherell. 2017. Investigating trade-offs between water quality and agricultural productivity using the Land Utilisation and Capability Indicator (LUCI)-A New Zealand application. *Ecosystem Services* 26: 388-399.
- 150.** Vauhkonen, J., and R. Ruotsalainen. 2017. Assessing the provisioning potential of ecosystem services in a Scandinavian boreal forest: Suitability and tradeoff analyses on grid-based wall-to-wall forest inventory data. *Forest Ecology and Management* 389: 272-284.
- 151.** Vigl, L.E., U. Schirpke, E. Tasser, and U. Tappeiner. 2016. Linking long-term landscape dynamics to the multiple interactions among ecosystem services in the European Alps. *Landscape Ecology* 31: 1903-1918.
- 152.** Wu, J.X., Y. Zhao, C.Q. Yu, L.M. Luo, and Y. Pan. 2017. Land management influences trade-offs and the total supply of ecosystem services in alpine grassland in Tibet, China. *Journal of environmental management* 193: 70-78.
- 153.** Xu, S.N., Y.F. Liu, X. Wang, and G.X. Zhang. 2017. Scale effect on spatial patterns of ecosystem services and associations among them in semi-arid area: A case study in Ningxia Hui Autonomous Region, China. *Science of the Total Environment* 598: 297-306.
- 154.** Yang, X.N., Z.X. Zhou, J. Li, X. Fu, X.M. Mu, and T. Li. 2016. Trade-offs between carbon sequestration, soil retention and water yield in the Guanzhong-Tianshui Economic Region of China. *Journal of Geographical Sciences* 26: 1449-1462.
- 155.** Yao, J., X.Y. He, W. Chen, Y. Ye, R.C. Guo, and L.Z. Yu. 2016. A local-scale spatial analysis of ecosystem services and ecosystem service bundles in the upper Hun River catchment, China. *Ecosystem Services* 22: 104-110.
- 156.** Zheng, H., Y.F. Li, B.E. Robinson, G. Liu, D.C. Ma, F.C. Wang, F. Lu, Z.Y. Ouyang, and G.C. Daily. 2016. Using ecosystem service trade-offs to inform water conservation policies and management practices. *Frontiers in Ecology and the Environment* 14: 527-532.
- 157.** Zheng, Z.M., B.J. Fu, and X.M. Feng. 2016. GIS-based analysis for hotspot identification of tradeoff between ecosystem services: A case study in Yanhe Basin, China. *Chinese Geographical Science* 26: 466-477.
- 158.** Zhou, Z.X., J. Li, Z.Z. Guo, and T. Li. 2017. Trade-offs between carbon, water, soil and food in Guanzhong-Tianshui economic region from remotely sensed data. *International Journal of Applied Earth Observation and Geoinformation* 58: 145-156.



## Appendix S2

### Supplementary graphics of the results

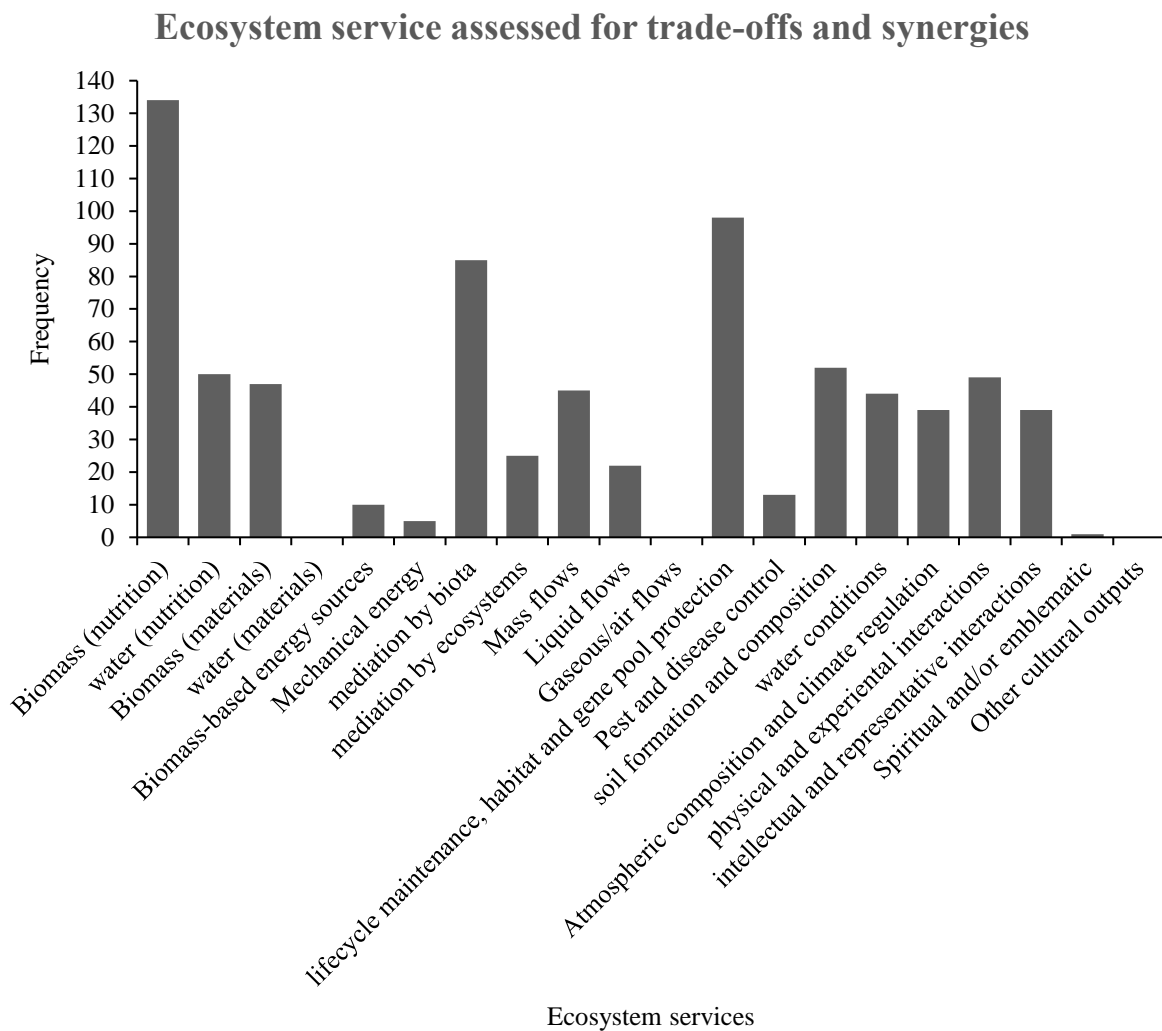

**Figure S1.** Recorded number of ecosystem services assessed for trade-offs and synergies in the literature review database. Ecosystem service groups as defined by CICES classification V4.3 (<http://cices.eu/>)

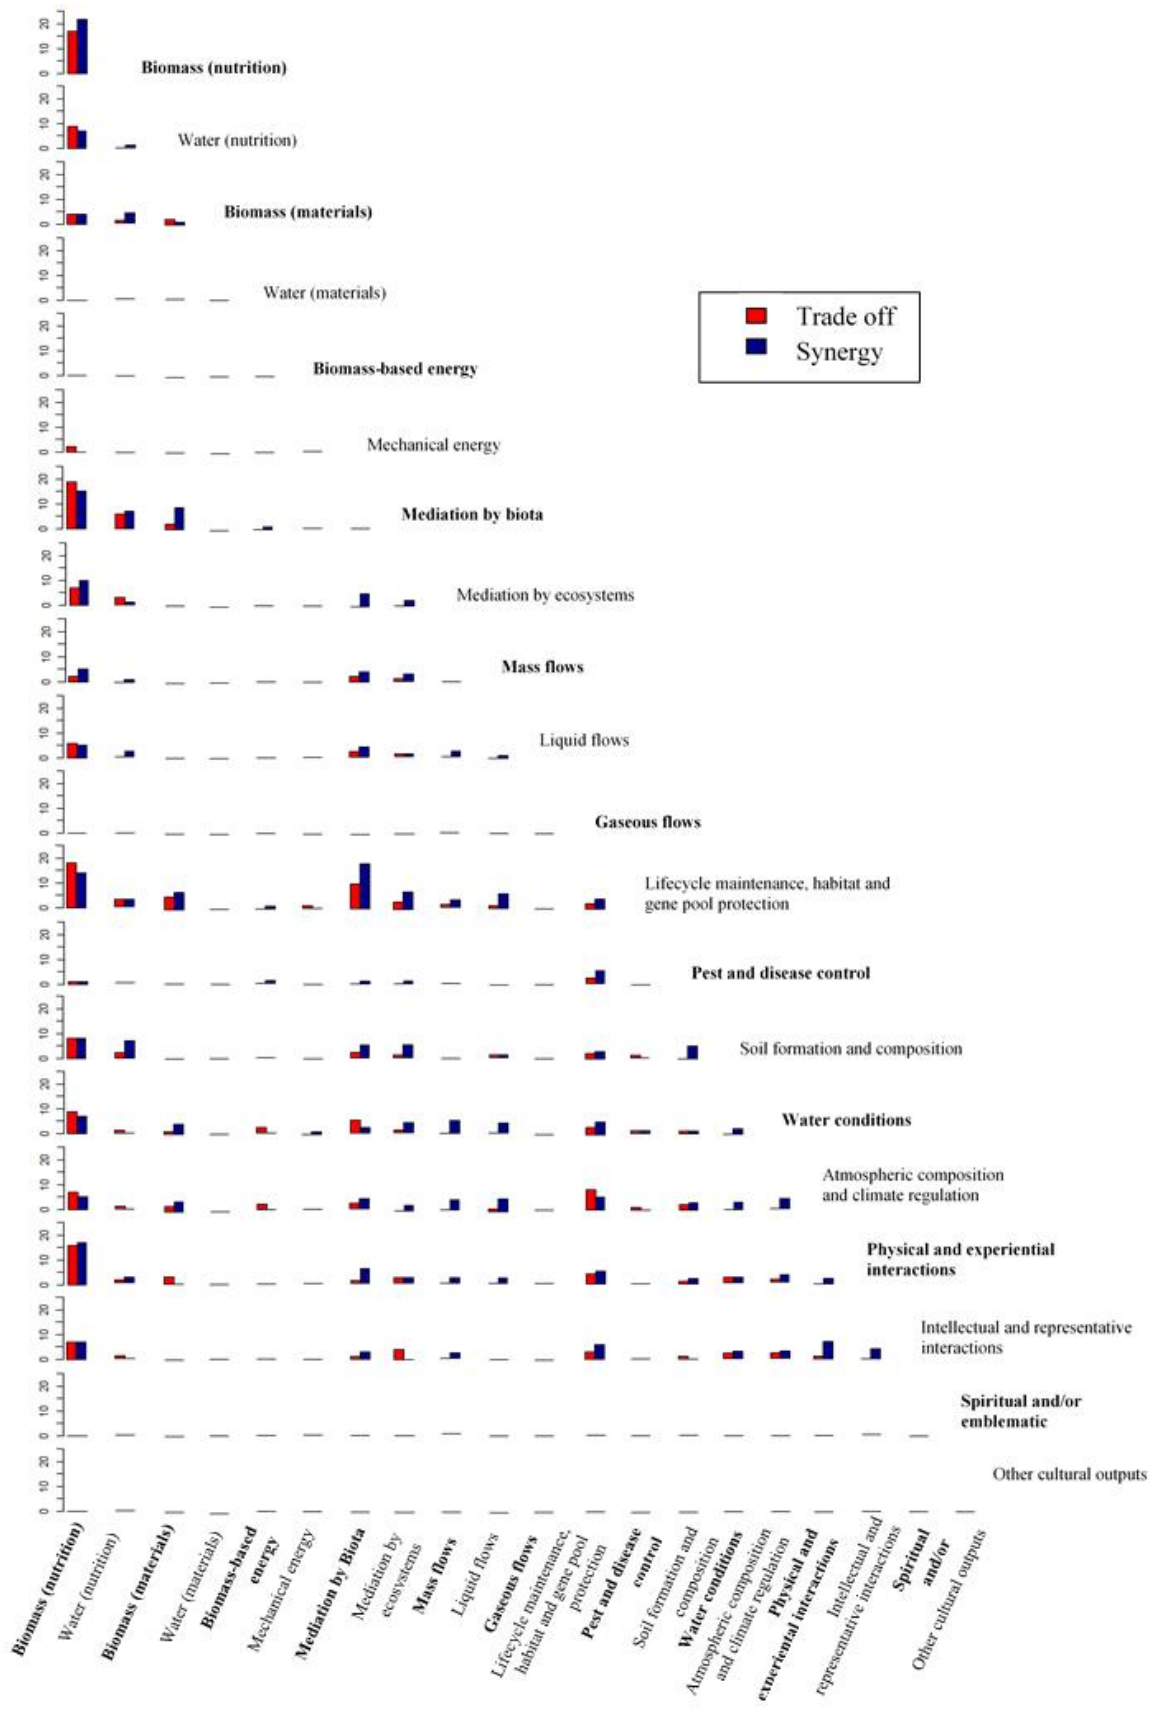

**Figure S2.** The number trade-offs and synergies identified between ecosystem services in the literature database. Ecosystem service groups as defined by CICES classification V4.3 (<http://cices.eu/>)
